# Supplementary material for: Structured ICU resource management in a pandemic is associated with favorable outcome in critically ill COVID‑19 patients
Source: Springer Nature journal article supplement (doi:10.1007/s00508-020-01764-0), 2020-11-01
Supplement: MOESM1 [file 18572532]

Supplementary Appendix

**Structured ICU resource management in a pandemic is associated with good outcome in critically ill COVID-19 patients**

ESM Tables 1-3

ESM Figure 1

List of COVID-19 intensive care units (ICUs) in Tyrol, Austria who participated in the Tyrolean COVID-19 Intensive Care Registry (Tyrol-CoV-ICU-Reg):

- Medical University Innsbruck, Innsbruck, Austria
  - Medical ICU, Department of Internal Medicine
  - Neurosurgical ICU, Department of Neurosurgery
  - Transplantation ICU, Department of General and Surgical Intensive Care Medicine/Department of Anesthesia and Critical Care Medicine
  - Recovery room “OZA” (adapted as temporary ICU), Department of General and Surgical Intensive Care Medicine/Department of Anesthesia and Critical Care Medicine
  - Recovery room “KHZ” (adapted as temporary ICU), Department of General and Surgical Intensive Care Medicine/Department of Anesthesia and Critical Care Medicine
- Hospital Hall, Hall, Austria
  - ICU, Department of Anesthesia and Intensive Care Medicine
- Hospital Kufstein, Kufstein, Austria
  - ICU, Department of Anesthesia and Intensive Care Medicine
- Hospital Lienz, Lienz, Austria
  - ICU, Department of Anesthesia and Intensive Care Medicine
- Hospital Reutte, Reutte, Austria
  - ICU, Department of Anesthesia and Intensive Care Medicine
- Hospital Schwaz, Schwaz, Austria
  - ICU, Department of Anesthesia and Critical Care Medicine
- Hospital St. Johann i.T., St. Johann in Tyrol, Austria
  - ICU, Department of Anesthesia and Intensive Care Medicine
- Hospital Zams
  - Medical ICU, Department of Internal Medicine
  - Surgical ICU, Department of Anesthesiology and Critical Care Medicine

ESM Table 1 Comorbidities and risk factors

| n                                    | Overall<br>106 | ICU survivors<br>83 | ICU non-survivors<br>23 | p      |
|--------------------------------------|----------------|---------------------|-------------------------|--------|
| <b>Comorbidities</b>                 |                |                     |                         |        |
| Cardiovascular (%)                   | 45 (42.5)      | 29 (34.9)           | 16 (69.6)               | 0.006  |
| Arterial hypertension (%)            | 71 (67.0)      | 54 (65.1)           | 17 (73.9)               | 0.583  |
| Renal (%)                            | 21 (19.8)      | 10 (12.0)           | 11 (47.8)               | <0.001 |
| Liver (%)                            | 7 (6.6)        | 5 (6.0)             | 2 (8.7)                 | 1.000  |
| Metastatic disease (%)               | 0 (0.0)        | 0 (0.0)             | 0 (0.0)                 | NA     |
| Hematological malignancy (%)         | 3 (2.8)        | 1 (1.2)             | 2 (8.7)                 | 0.228  |
| Non hematological malignancy (%)     | 5 (4.8)        | 3 (3.6)             | 2 (9.1)                 | 0.610  |
| Immunosuppression (%)                | 11 (10.4)      | 9 (10.8)            | 2 (8.7)                 | 1.000  |
| COPD (%)                             | 14 (13.2)      | 10 (12.0)           | 4 (17.4)                | 0.748  |
| Asthma (%)                           | 7 (6.6)        | 5 (6.0)             | 2 (8.7)                 | 1.000  |
| Respiratory - other (%)              | 13 (12.3)      | 8 (9.6)             | 5 (21.7)                | 0.228  |
| Neurological (%)                     | 11 (10.4)      | 9 (10.8)            | 2 (8.7)                 | 1.000  |
| Diabetes mellitus (%)                |                |                     |                         | 0.803  |
| no DM                                | 86 (81.1)      | 68 (81.9)           | 18 (78.3)               |        |
| Prediabetes                          | 2 (1.9)        | 1 (1.2)             | 1 (4.3)                 |        |
| DM Type I                            | 1 (0.9)        | 1 (1.2)             | 0 (0.0)                 |        |
| DM Type II                           | 16 (15.1)      | 12 (14.5)           | 4 (17.4)                |        |
| DM (other Type, e.g. MODY)           | 1 (0.9)        | 1 (1.2)             | 0 (0.0)                 |        |
| BMI [kg/m <sup>2</sup> ] (%)         |                |                     |                         | 0.266  |
| <25                                  | 24 (24.2)      | 21 (27.6)           | 3 (13.0)                |        |
| 25<30                                | 51 (51.5)      | 40 (52.6)           | 11 (47.8)               |        |
| 30<35                                | 15 (15.2)      | 9 (11.8)            | 6 (26.1)                |        |
| 35<40                                | 8 (8.1)        | 5 (6.6)             | 3 (13.0)                |        |
| >40                                  | 1 (1.0)        | 1 (1.3)             | 0 (0.0)                 |        |
| Metabolic syndrome (%)               | 16 (15.1)      | 10 (12.0)           | 6 (26.1)                | 0.182  |
| <b>Risk factors</b>                  |                |                     |                         |        |
| Smoking within 30 days (%)           | 11 (11.8)      | 7 (9.6)             | 4 (20.0)                | 0.375  |
| Prior smoking (%)                    | 25 (29.4)      | 18 (26.9)           | 7 (38.9)                | 0.482  |
| ACE-inhibitor (%)                    | 19 (18.3)      | 16 (19.5)           | 3 (13.6)                | 0.747  |
| ARB (%)                              | 19 (18.3)      | 9 (11.0)            | 10 (45.5)               | 0.001  |
| NSAID (%)                            | 14 (14.4)      | 11 (14.7)           | 3 (13.6)                | 1.000  |
| Corticosteroids (%)                  | 13 (12.4)      | 11 (13.3)           | 2 (9.1)                 | 0.871  |
| Non-steroidal immunosuppressives (%) | 7 (6.7)        | 5 (6.0)             | 2 (9.1)                 | 0.974  |

ICU – intensive care unit, COPD – chronic obstructive pulmonary disease, DM – diabetes mellitus, MODY – maturity onset diabetes of the young, BMI – body mass index, ACE – angiotensin-converting enzyme, ARB – angiotensin II receptor blocker, NSAID – nonsteroidal anti-inflammatory drug

ESM Table 2 Lab values available for 49 patients treated at the University Hospital Innsbruck

|                                                   | Overall                         | ICU survivors                  | ICU non-survivors                | p      |
|---------------------------------------------------|---------------------------------|--------------------------------|----------------------------------|--------|
| n                                                 | 49                              | 38                             | 11                               |        |
| Lowest leukocyte count [G/l]<br>(median [IQR])    | 6.00 [4.30, 7.40]               | 5.90 [4.30, 7.07]              | 7.40 [4.00, 9.75]                | 0.395  |
| Highest leukocyte count [G/l]<br>(median [IQR])   | 13.50 [10.90, 17.50]            | 13.35 [10.12, 16.85]           | 16.80 [12.95, 19.45]             | 0.087  |
| Lowest lymphocyte count<br>[%] (median [IQR])     | 6.50 [4.10, 9.65]               | 6.85 [4.22, 10.10]             | 4.50 [2.80, 7.35]                | 0.142  |
| Lowest thrombocyte count<br>[G/l] (median [IQR])  | 168.00 [120.00,<br>216.00]      | 179.50 [130.00, 213.75]        | 100.00 [80.00, 218.50]           | 0.242  |
| Highest thrombocyte count<br>[G/l] (median [IQR]) | 388.00 [262.00,<br>462.00]      | 404.50 [294.75, 482.50]        | 278.00 [191.00, 320.50]          | 0.001  |
| Lowest PT [%] (median<br>[IQR])                   | 71.00 [44.75, 88.00]            | 73.00 [46.00, 91.00]           | 57.00 [42.00, 77.00]             | 0.229  |
| Highest PT [%] (median<br>[IQR])                  | 101.50 [96.75,<br>109.00]       | 102.00 [97.00, 109.00]         | 101.00 [93.00, 107.50]           | 0.676  |
| Highest D-dimer [µg/l]<br>(median [IQR])          | 11253.50 [5340.50,<br>33109.00] | 9264.00 [3406.00,<br>20294.50] | 34690.00 [11683.50,<br>35200.00] | 0.005  |
| Highest CRP [mg/dl] (median<br>[IQR])             | 29.27 [17.76, 34.53]            | 27.11 [16.93, 33.70]           | 34.53 [28.23, 42.63]             | 0.018  |
| Highest IL-6 [ng/l] (median<br>[IQR])             | 744.70 [371.80,<br>1425.00]     | 633.85 [270.93,<br>1217.25]    | 989.80 [593.15,<br>3342.50]      | 0.061  |
| Highest procalcitonin [µg/l]<br>(median [IQR])    | 1.46 [0.54, 3.05]               | 1.28 [0.45, 2.07]              | 4.42 [1.56, 7.39]                | 0.025  |
| Highest TropT [ng/l] (median<br>[IQR])            | 38.55 [22.62, 62.10]            | 26.90 [17.60, 47.75]           | 63.80 [51.55, 80.50]             | 0.002  |
| Highest creatinine [mg/dl]<br>(median [IQR])      | 1.38 [1.02, 1.76]               | 1.31 [1.00, 1.73]              | 1.55 [1.28, 2.92]                | 0.125  |
| Highest cystatin c [mg/l]<br>(median [IQR])       | 2.01 [1.45, 2.77]               | 1.63 [1.35, 2.46]              | 2.23 [1.83, 2.94]                | 0.124  |
| Highest GOT [U/l] (median<br>[IQR])               | 106.00 [69.00,<br>192.00]       | 94.00 [63.75, 172.25]          | 154.00 [125.50, 311.00]          | 0.055  |
| Highest GPT [U/l] (median<br>[IQR])               | 122.50 [56.00,<br>214.50]       | 122.00 [56.00, 206.00]         | 126.00 [66.00, 256.50]           | 0.564  |
| Highest AP [U/l] (median<br>[IQR])                | 229.00 [102.00,<br>349.50]      | 220.00 [102.00, 340.00]        | 275.00 [148.50, 557.50]          | 0.162  |
| Lowest albumin [mg/dl]<br>(median [IQR])          | 1817.00 [1606.00,<br>2115.00]   | 1824.00 [1518.25,<br>2089.00]  | 1754.00 [1673.00,<br>2154.50]    | 0.660  |
| Lowest Horovitz (median<br>[IQR])                 | 85.45 [65.62, 118.19]           | 93.69 [75.14, 126.83]          | 62.11 [55.90, 73.68]             | 0.008  |
| Lowest pO2 [mmHg]<br>(median [IQR])               | 62.25 [54.82, 67.67]            | 62.90 [56.60, 67.90]           | 59.00 [52.00, 67.25]             | 0.345  |
| Highest FiO2 [%] (median<br>[IQR])                | 72.50 [58.75, 100.00]           | 70.00 [52.00, 95.00]           | 100.00 [80.00, 100.00]           | <0.001 |

ICU – intensive care unit, IQR- interquartile range, PT – prothrombin time, CRP – c-reactive protein, IL-6 – interleukin 6, TropT – troponin T, GOT - glutamic oxaloacetic transaminase, GPT - glutamate-pyruvate transaminase, AP – alkaline phosphatase

ESM Table 2 Patient characteristics grouped by Age below and greater than 64 years

|                                                    | Overall              | Age ≤ 64 years       | Age > 64 years       | p      |
|----------------------------------------------------|----------------------|----------------------|----------------------|--------|
| n                                                  | 106                  | 65                   | 41                   |        |
| Age (median [IQR])                                 | 64.00 [54.00, 74.50] | 57.00 [52.00, 63.00] | 76.00 [72.00, 80.00] | <0.001 |
| Male (%)                                           | 76 (71.7)            | 52 (80.0)            | 24 (58.5)            | 0.030  |
| BMI (median [IQR])                                 | 26.83 [25.07, 29.95] | 26.83 [25.11, 29.93] | 26.85 [24.79, 29.78] | 0.827  |
| HbA1c [%] (median [IQR])                           | 6.20 [5.70, 6.70]    | 6.15 [5.70, 6.68]    | 6.20 [5.90, 6.80]    | 0.325  |
| SAPS III (median [IQR])                            | 56.00 [49.00, 64.00] | 50.00 [46.00, 61.25] | 61.00 [56.00, 68.00] | <0.001 |
| Pat. from nursing home (%)                         | 0 (0.0)              | 0 (0.0)              | 0 (0.0)              | NA     |
| Legal guardian (%)                                 | 2 (1.9)              | 1 (1.5)              | 1 (2.4)              | 1.000  |
| Admission state (%)                                |                      |                      |                      | 0.007  |
| Fully independent daily living                     | 91 (85.8)            | 61 (93.8)            | 30 (73.2)            |        |
| Requires some assistance in daily activities       | 12 (11.3)            | 4 (6.2)              | 8 (19.5)             |        |
| Requires full assistance in daily activities       | 3 (2.8)              | 0 (0.0)              | 3 (7.3)              |        |
| Hospital LOS [days] (median [IQR])                 | 27.00 [13.25, 49.50] | 29.00 [18.00, 54.00] | 22.00 [9.00, 48.00]  | 0.119  |
| ICU LOS [days] (median [IQR])                      | 18.50 [5.25, 31.75]  | 19.00 [11.00, 32.00] | 12.00 [5.00, 25.00]  | 0.309  |
| Death in ICU (%)                                   | 23 (21.7)            | 6 (9.2)              | 17 (41.5)            | <0.001 |
| Death in hospital (%)                              | 24 (22.6)            | 6 (9.2)              | 18 (43.9)            | <0.001 |
| AKI (%)                                            |                      |                      |                      | 0.100  |
| no AKI                                             | 54 (50.9)            | 39 (60.0)            | 15 (36.6)            |        |
| KDIGO I                                            | 16 (15.1)            | 9 (13.8)             | 7 (17.1)             |        |
| KDIGO II                                           | 9 (8.5)              | 5 (7.7)              | 4 (9.8)              |        |
| KDIGO III                                          | 27 (25.5)            | 12 (18.5)            | 15 (36.6)            |        |
| RRT (%)                                            | 21 (19.8)            | 12 (18.5)            | 9 (22.0)             | 0.850  |
| IMV (%)                                            | 72 (67.9)            | 46 (70.8)            | 26 (63.4)            | 0.564  |
| vv-ECMO (%)                                        | 6 (5.7)              | 6 (9.2)              | 0 (0.0)              | 0.116  |
| IMV [days] (median [IQR])                          | 15.00 [10.75, 24.00] | 15.50 [11.00, 24.00] | 15.00 [9.25, 22.50]  | 0.435  |
| NIV [days] (median [IQR])                          | 3.00 [1.00, 6.00]    | 3.00 [1.00, 6.00]    | 4.00 [1.75, 6.00]    | 0.328  |
| NHF [days] (median [IQR])                          | 1.00 [1.00, 1.50]    | 1.00 [1.00, 2.00]    | 1.00 [1.00, 1.00]    | 0.618  |
| Prone positioning [days] (median [IQR])            | 4.00 [2.00, 5.75]    | 5.00 [2.00, 6.00]    | 3.00 [1.00, 5.00]    | 0.110  |
| Continuous muscle relaxation [days] (median [IQR]) | 1.00 [1.00, 2.00]    | 1.00 [1.00, 2.00]    | 1.00 [1.00, 1.00]    | 0.296  |
| RRT [days] (median [IQR])                          | 11.00 [3.00, 26.00]  | 17.50 [9.00, 26.50]  | 8.00 [3.00, 11.00]   | 0.154  |
| vv-ECMO [days] (median [IQR])                      | 12.00 [11.25, 14.25] | 12.00 [11.25, 14.25] | NA [NA, NA]          | NA     |

IQR – interquartile range, BMI – body mass index, HbA1c – glycated hemoglobin, SAPS – simplified acute physiology score, ICU – intensive care unit, LOS – length of stay, AKI – acute kidney injury, KDIGO – kidney disease: improving global outcomes, RRT - renal replacement therapy, vv-ECMO – veno-venous extracorporeal membrane oxygenation, IMV – invasive mechanical ventilation, NIV – non-invasive ventilation, NHF- nasal high flow

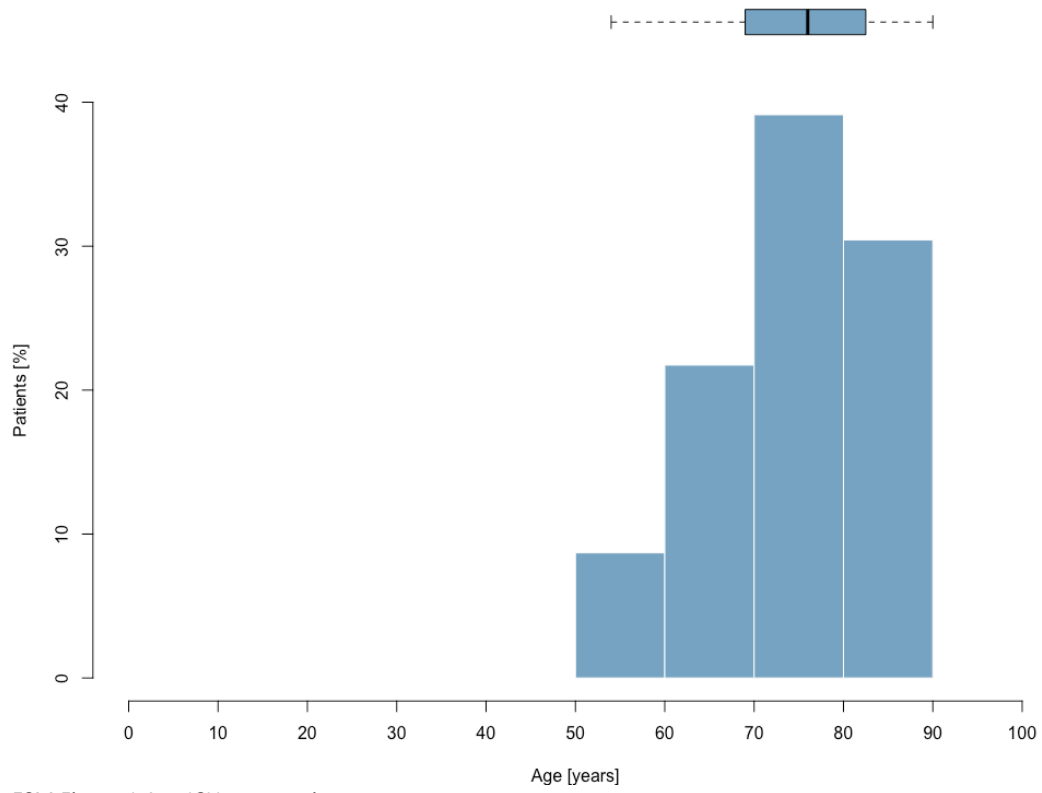

ESM Figure 1 Age ICU non-survivors
